# Supplementary material for: Investigating correlations in the altered metabolic profiles of obese and diabetic subjects in a South Indian Asian population using an NMR-based metabolomic approach
Source: Royal Society of Chemistry journal article supplement (doi:10.1039/c4mb00507d), 2014-11-25
Supplement: c4mb00507d1.pdf [file c4mb00507d1.pdf]

## Supporting Information

### <sup>1</sup>H NMR-Based Metabolomic Profiling of Diabetes and BMI-Related Changes in the Serum of South-Asian Population

Navdeep Gogna<sup>a</sup>, Krishna Murahari<sup>b</sup>, Anup Mammen Oomen<sup>b</sup>, and Kavita Dorai<sup>a</sup>

<sup>a</sup>Department of Physical Sciences, Indian Institute of Science Education & Research (IISER) Mohali, Sector 81 SAS Nagar, Manauli PO 140306 Punjab India.

<sup>b</sup>Connexios Life Sciences Pvt Ltd., Shilpa Vidya, JP Nagar, Bangalore 560078 Karnataka India.

Figure S1

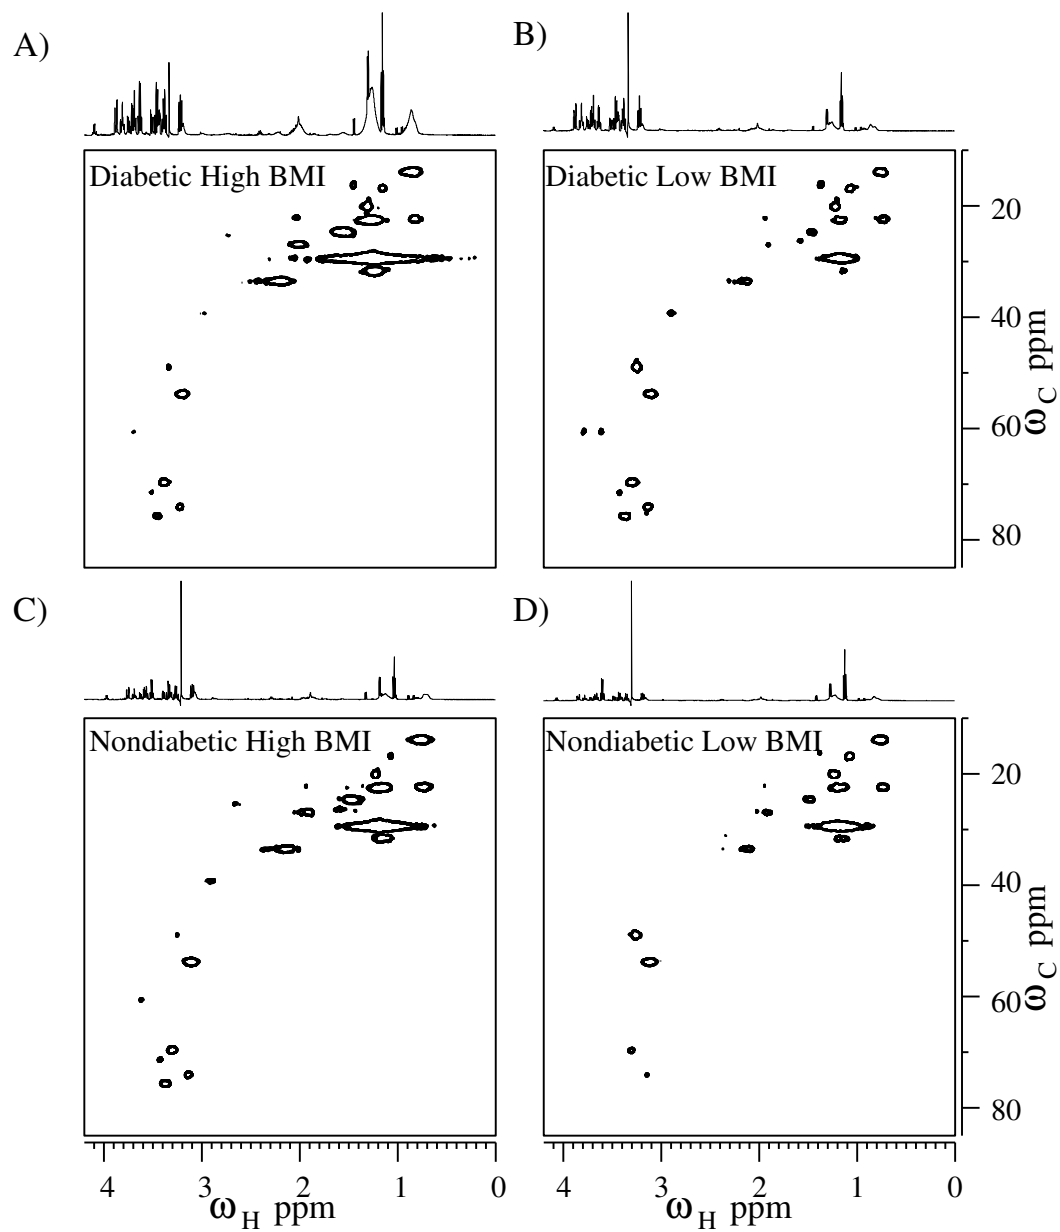

Figure 1: 2D HSQC NMR spectrum of (A) Diabetic-High BMI, (B) Diabetic-Low BMI, (C) Non diabetic-High BMI and (D) Non diabetic-Low BMI subjects, recorded at 600 MHz

Figure S2

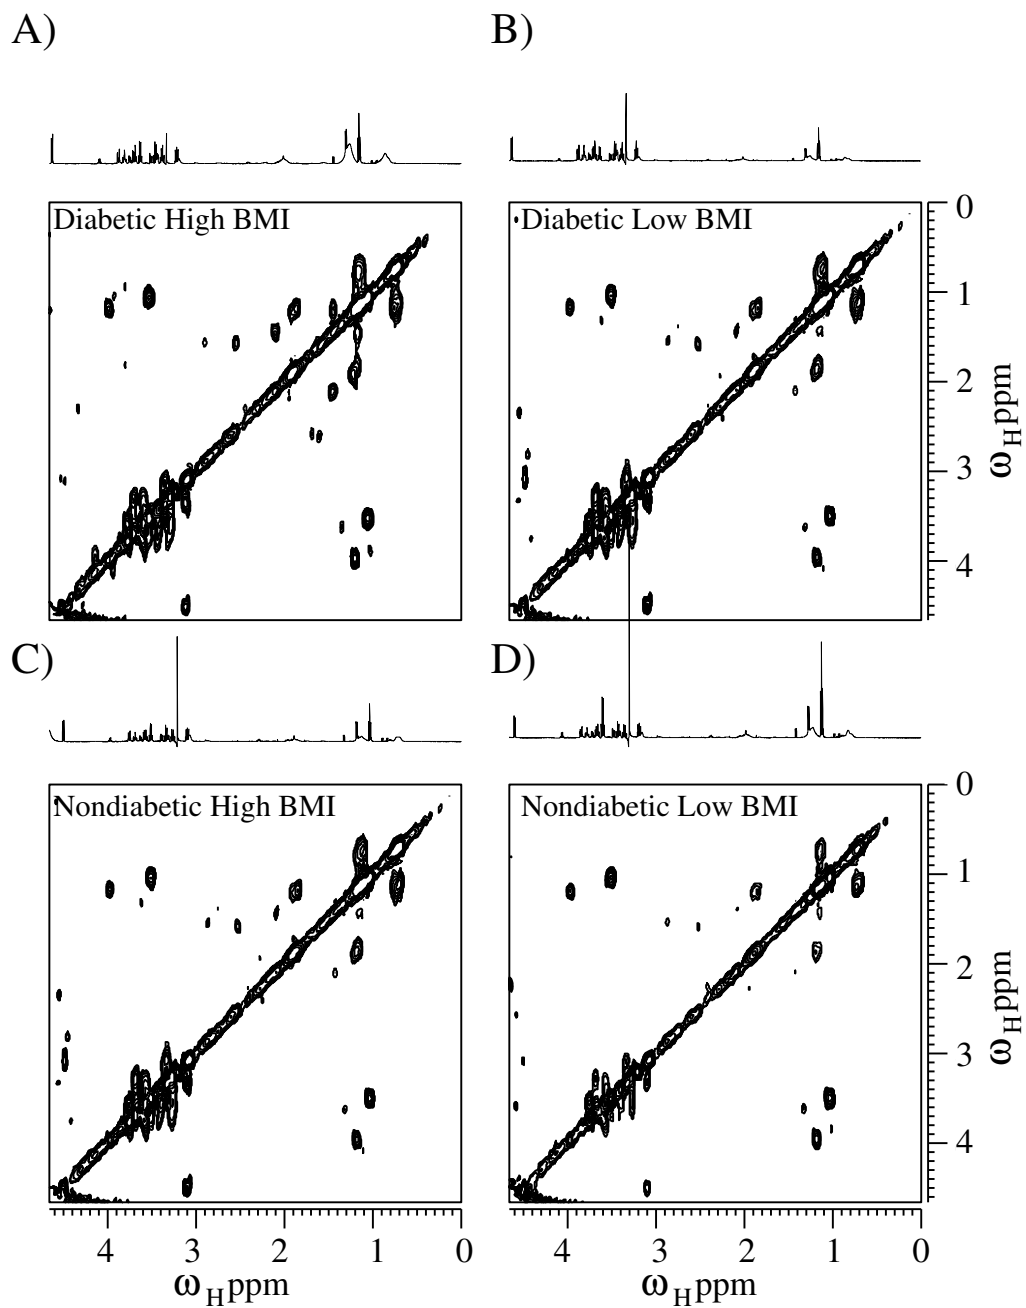

Figure 2: 2D COSY NMR spectrum of (A) Diabetic-High BMI, (B) Diabetic-Low BMI, (C) Non diabetic-High BMI and (D) Non diabetic-Low BMI subjects, recorded at 600 MHz

Table ST1

| Metabolite                | Chemical shift (ppm) | Identified by | Metabolite                            | Chemical shift (ppm) | Identified by |
|---------------------------|----------------------|---------------|---------------------------------------|----------------------|---------------|
| <b>Amino acids</b>        |                      |               | <b>Keto acids</b>                     |                      |               |
| Isoleucine                | 0.94                 | 1D,2D         | Ketoleucine                           | 2.12                 | 1D            |
| Valine                    | 0.98                 | 1D, 2D        | Pyruvic acid                          | 2.46                 | 1D            |
| Alloisoleucine            | 1.29                 | 1D            | Amino-levulinic acid                  | 2.77                 | 1D            |
| Alanine                   | 1.47                 | 1D            | Acetoacetic acid                      | 3.43                 | 1D            |
| Lysine                    | 1.68                 | 1D, 2D        | <b>Lipids</b>                         |                      |               |
| Acetylglycine             | 2.05                 | 1D            | Lipid terminal methyl                 | 0.91                 | 1D, 2D        |
| Glutamate                 | 2.12                 | 1D            | Lipid backbone methylene groups       | 1.31                 | 1D, 2D        |
| Ketoleucine               | 2.13                 | 1D            | <b>Sphingolipids</b>                  |                      |               |
| Glutamine                 | 2.14,2.44            | 1D, 2D        | Sphinganine                           | 1.54                 | 1D            |
| Asparagine                | 2.86                 | 1D, 2D        | <b>Bile acids</b>                     |                      |               |
| Creatine                  | 3.03                 | 1D            | Chenodeoxycholic acid                 | 1.49                 | 1D            |
| Phenylalanine             | 3.30                 | 1D, 2D        | <b>Hydroxy acids</b>                  |                      |               |
| Proline                   | 3.33                 | 1D            | 3-hydroxybutyric acid                 | 1.19, 1.20           | 1D            |
| Glycine                   | 3.54                 | 1D            | <b>Vitamins</b>                       |                      |               |
| Threonine                 | 3.58                 | 1D, 2D        | Pantothenic acid                      | 3.43                 | 1D, 2D        |
| Leucine                   | 3.73                 | 1D, 2D        | <b>Purines and purine derivatives</b> |                      |               |
| Serine                    | 3.83                 | 1D            | 3,7-dimethyluric acid                 | 3.35                 | 1D, 2D        |
| Ureidopropionic acid      | 3.28                 | 1D            | <b>Fatty acids</b>                    |                      |               |
| Tyrosine                  | 6.87, 7.17           | 1D            | Acetic acid                           | 1.91                 | 1D            |
| Histidine                 | 7.05, 7.73           | 1D, 2D        | Isovaleric acid                       | 1.95                 | 1D            |
| <b>Hydroxy acids</b>      |                      |               | <b>Sugars</b>                         |                      |               |
| Lactic acid               | 1.33, 4.12           | 1D, 2D        | Ribose                                | 2.21                 | 1D            |
| Glycolic acid             | 3.94                 | 1D            | Glycogen                              | 3.71                 | 1D, 2D        |
| Galactonic acid           | 3.95                 | 1D            | Fucose                                | 3.75                 | 1D            |
| <b>Dicarboxylic acids</b> |                      |               | Galactose                             | 3.85                 | 1D            |
| Oxalacetic acid           | 2.38                 | 1D            | Fructose                              | 3.90                 | 1D            |
| Oxalglutaric acid         | 2.44                 | 1D            | Sucrose                               | 4.22                 | 1D, 2D        |
| <b>Sugar alcohols</b>     |                      |               | beta-glucose                          | 4.63                 | 1D, 2D        |
| Ribitol                   | 3.65                 | 1D            | Trehalose                             | 4.64                 | 1D            |
| Sorbitol                  | 3.75                 | 1D, 2D        | alpha-glucose                         | 5.14                 | 1D, 2D        |
| Glycerol                  | 3.78                 | 1D, 2D        | <b>Others</b>                         |                      |               |
| Arabitol                  | 3.84                 | 1D            | Choline                               | 3.19                 | 1D, 2D        |
|                           |                      |               | Myoinositol                           | 3.49                 | 1D, 2D        |

Table 1: List of various metabolites and their NMR chemical shift values and types of NMR experiments used for metabolite fingerprinting of serum samples.

Table ST2

| Metabolite             | p-value     | -log10(p) | FDR        | Fisher's LSD                                  |
|------------------------|-------------|-----------|------------|-----------------------------------------------|
| Choline                | 0.00001167  | 4.9329    | 0.00015673 | D-HighBMI - ND-LowBMI<br>D-LowBMI - ND-LowBMI |
| Proline                | 0.00001783  | 4.7486    | 0.00020960 | D-HighBMI - ND-LowBMI<br>D-LowBMI - ND-LowBMI |
| 3,7-dimethyl uric acid | 0.00002135  | 4.6707    | 0.00021093 | D-HighBMI - ND-LowBMI<br>D-LowBMI - ND-LowBMI |
| Glucose                | 0.00002468  | 4.6076    | 0.00021093 | D-HighBMI - ND-LowBMI<br>D-LowBMI - ND-LowBMI |
| Pantothenic acid       | 0.000030465 | 4.5162    | 0.00023860 | D-HighBMI - ND-LowBMI<br>D-LowBMI - ND-LowBMI |
| Glycerol               | 0.000061967 | 4.2078    | 0.00044807 | D-HighBMI - ND-LowBMI<br>D-LowBMI - ND-LowBMI |
| Histidine              | 0.0000839   | 4.0758    | 0.00056393 | D-HighBMI - ND-LowBMI<br>D-LowBMI - ND-LowBMI |
| 3-OH butyric acid      | 0.00065025  | 3.1869    | 0.0040749  | D-HighBMI - ND-LowBMI<br>D-LowBMI - ND-LowBMI |
| Leucine                | 0.0006964   | 3.1571    | 0.0040913  | D-HighBMI - ND-LowBMI<br>D-LowBMI - ND-LowBMI |
| Sorbitol               | 0.0043542   | 2.3611    | 0.024076   | D-HighBMI - ND-LowBMI<br>D-LowBMI - ND-LowBMI |
| Myoinositol            | 0.0049209   | 2.308     | 0.025336   | D-HighBMI - ND-LowBMI<br>D-LowBMI - ND-LowBMI |
| Threonine              | 0.0051211   | 2.2906    | 0.025336   | D-HighBMI - ND-LowBMI<br>D-LowBMI - ND-LowBMI |
| Isoleucine             | 0.0096155   | 2.017     | 0.044039   | D-HighBMI - ND-LowBMI<br>D-LowBMI - ND-LowBMI |
| Lysine                 | 0.0098384   | 2.0071    | 0.044039   | D-HighBMI - ND-LowBMI<br>D-LowBMI - ND-LowBMI |
| Saturated fatty acids  | 0.011722    | 1.931     | 0.050084   | D-HighBMI - ND-LowBMI<br>D-LowBMI - ND-LowBMI |
| Lactate                | 0.013404    | 1.8728    | 0.054782   | D-HighBMI - ND-LowBMI<br>D-LowBMI - ND-LowBMI |
| Valine                 | 0.024974    | 1.6025    | 0.086948   | D-HighBMI - ND-LowBMI<br>D-LowBMI - ND-LowBMI |
| Phenylalanine          | 0.029161    | 1.5352    | 0.097898   | D-HighBMI - ND-LowBMI<br>D-LowBMI - ND-LowBMI |
| Glutamine              | 0.045682    | 1.3403    | 0.14314    | D-HighBMI - ND-LowBMI<br>D-LowBMI - ND-LowBMI |

Table 2: Post hoc analysis showing which groups are different given the p value threshold of 0.05, for Diabetic-High BMI, Diabetic-Low BMI and Non diabetic-Low BMI subjects.

Table ST3

| Metabolite             | p-value    | -log <sub>10</sub> (p) | FDR       | Fisher's LSD                                                            |
|------------------------|------------|------------------------|-----------|-------------------------------------------------------------------------|
| Choline                | 0.00006154 | 4.2108                 | 0.001919  | D-HighBMI - ND-HighBMI<br>D-HighBMI - ND-LowBMI                         |
| 3,7-dimethyl uric acid | 0.00008284 | 4.0818                 | 0.001919  | D-HighBMI - ND-HighBMI<br>D-HighBMI - ND-LowBMI                         |
| Proline                | 0.00009955 | 4.0019                 | 0.001919  | D-HighBMI - ND-HighBMI<br>D-HighBMI - ND-LowBMI                         |
| Pantothenic acid       | 0.0001021  | 3.9911                 | 0.001919  | D-HighBMI - ND-HighBMI<br>D-HighBMI - ND-LowBMI                         |
| Sorbitol               | 0.0006173  | 3.7763                 | 0.002622  | D-HighBMI - ND-HighBMI<br>D-HighBMI - ND-LowBMI                         |
| Glucose                | 0.0004403  | 3.3562                 | 0.0059127 | D-HighBMI - ND-HighBMI<br>D-HighBMI - ND-LowBMI                         |
| Glycerol               | 0.001680   | 2.7747                 | 0.01754   | D-HighBMI - ND-HighBMI<br>D-HighBMI - ND-LowBMI                         |
| Myoinositol            | 0.002050   | 2.6882                 | 0.019274  | D-HighBMI - ND-HighBMI<br>D-HighBMI - ND-LowBMI                         |
| Histidine              | 0.0031308  | 2.5043                 | 0.026754  | D-HighBMI - ND-HighBMI<br>D-HighBMI - ND-LowBMI                         |
| Leucine                | 0.0039119  | 2.4076                 | 0.029835  | D-HighBMI - ND-HighBMI<br>D-HighBMI - ND-LowBMI                         |
| 3-OH butyric acid      | 0.005139   | 2.2891                 | 0.034505  | D-HighBMI - ND-HighBMI<br>D-HighBMI - ND-LowBMI                         |
| Threonine              | 0.0065635  | 2.1829                 | 0.040789  | D-HighBMI - ND-HighBMI<br>D-HighBMI - ND-LowBMI                         |
| Lysine                 | 0.0069429  | 2.1585                 | 0.040789  | D-HighBMI - ND-HighBMI<br>D-HighBMI - ND-LowBMI                         |
| Isoleucine             | 0.0094388  | 2.0251                 | 0.052191  | D-HighBMI - ND-HighBMI<br>D-HighBMI - ND-LowBMI<br>ND-HighBMI-ND-LowBMI |
| Saturated fatty acids  | 0.01303    | 1.8851                 | 0.068046  | D-HighBMI - ND-HighBMI<br>D-HighBMI - ND-LowBMI<br>ND-HighBMI-ND-LowBMI |
| Lactate                | 0.017685   | 1.7524                 | 0.083122  | D-HighBMI - ND-HighBMI<br>D-HighBMI - ND-LowBMI<br>ND-HighBMI-ND-LowBMI |
| Valine                 | 0.035391   | 1.4511                 | 0.12795   | D-HighBMI - ND-HighBMI<br>D-HighBMI - ND-LowBMI<br>ND-HighBMI-ND-LowBMI |
| Phenylalanine          | 0.040621   | 1.3913                 | 0.14142   | D-HighBMI - ND-HighBMI<br>D-HighBMI - ND-LowBMI<br>ND-HighBMI-ND-LowBMI |
| Glutamine              | 0.047726   | 1.3212                 | 0.16022   | D-HighBMI - ND-HighBMI<br>D-HighBMI - ND-LowBMI                         |

Table 3: Post hoc analysis showing which groups are different given the p value threshold of 0.05, for Diabetic-High BMI, Non diabetic-High BMI and Non diabetic-Low BMI subjects.
